# Supplementary material for: Strain tracking with uncertainty quantification
Source: bioRxiv or medRxiv preprint supplement (doi:10.1101/2023.01.25.525531), 2024-07-23
Supplement: Supplementary file [file media-2.pdf]

# Supplemental Figures

## Complete UMB Results

Here, we provide all figures akin to participant UMB18's results shown in the main text. Participant UMB30, whose samples yielded no *E. coli* calls by either method, is omitted.

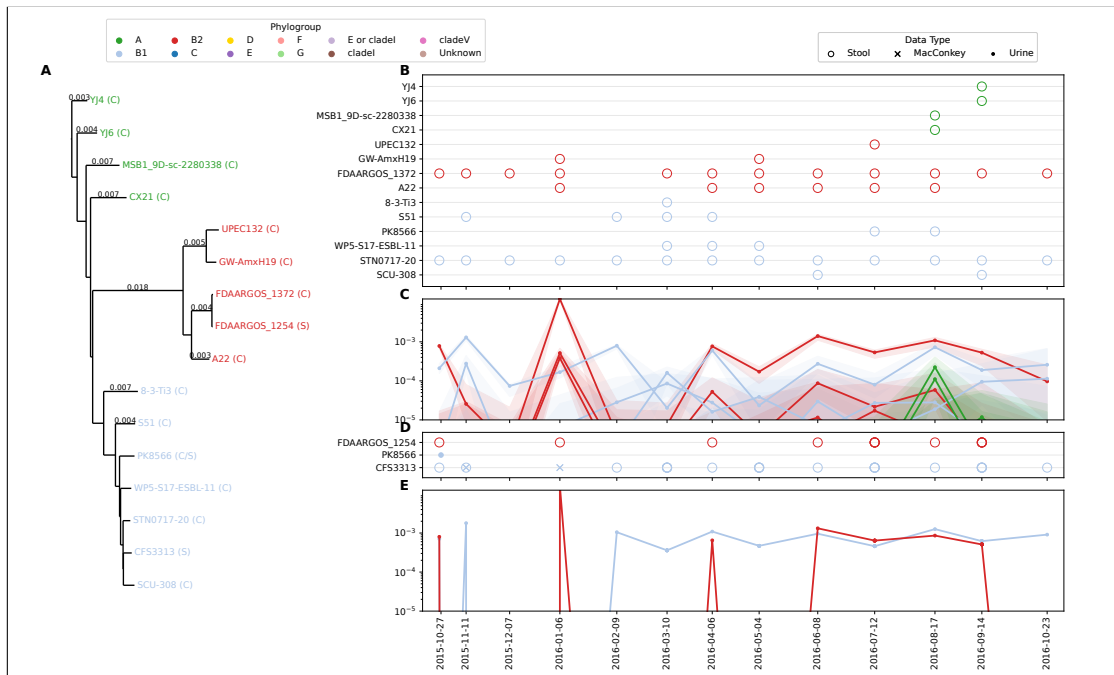

Supplemental Figure 1: Participant UMB01

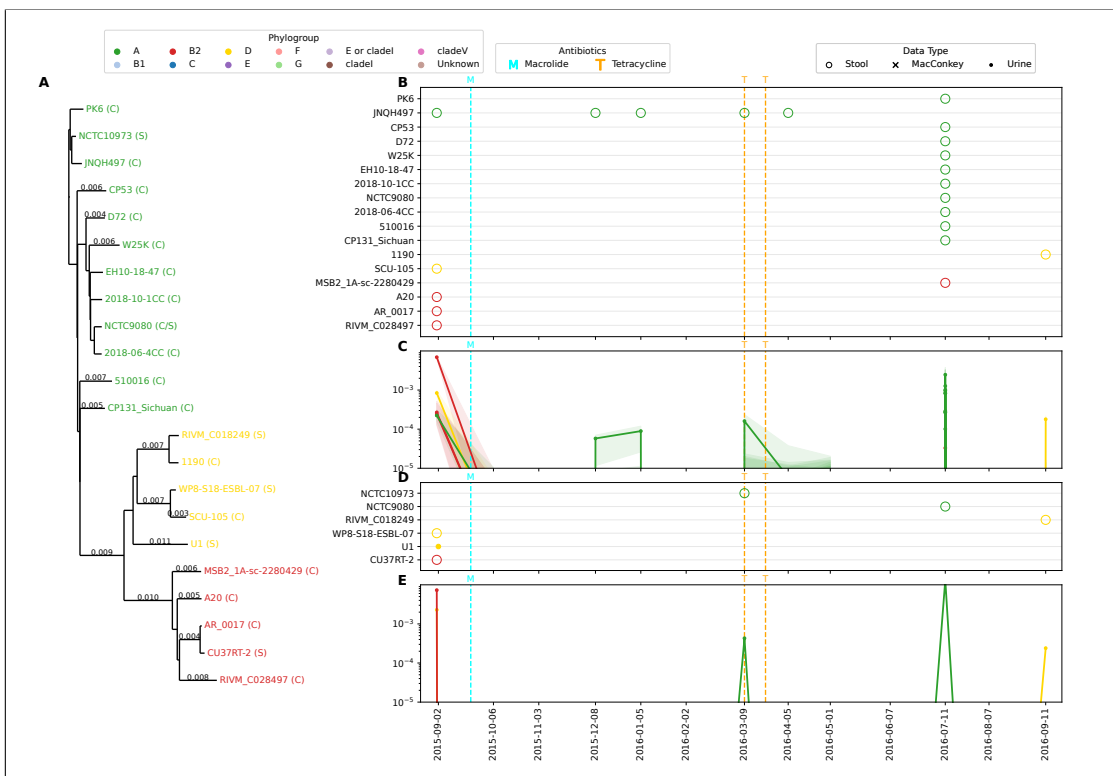

Supplemental Figure 2: Participant UMB02

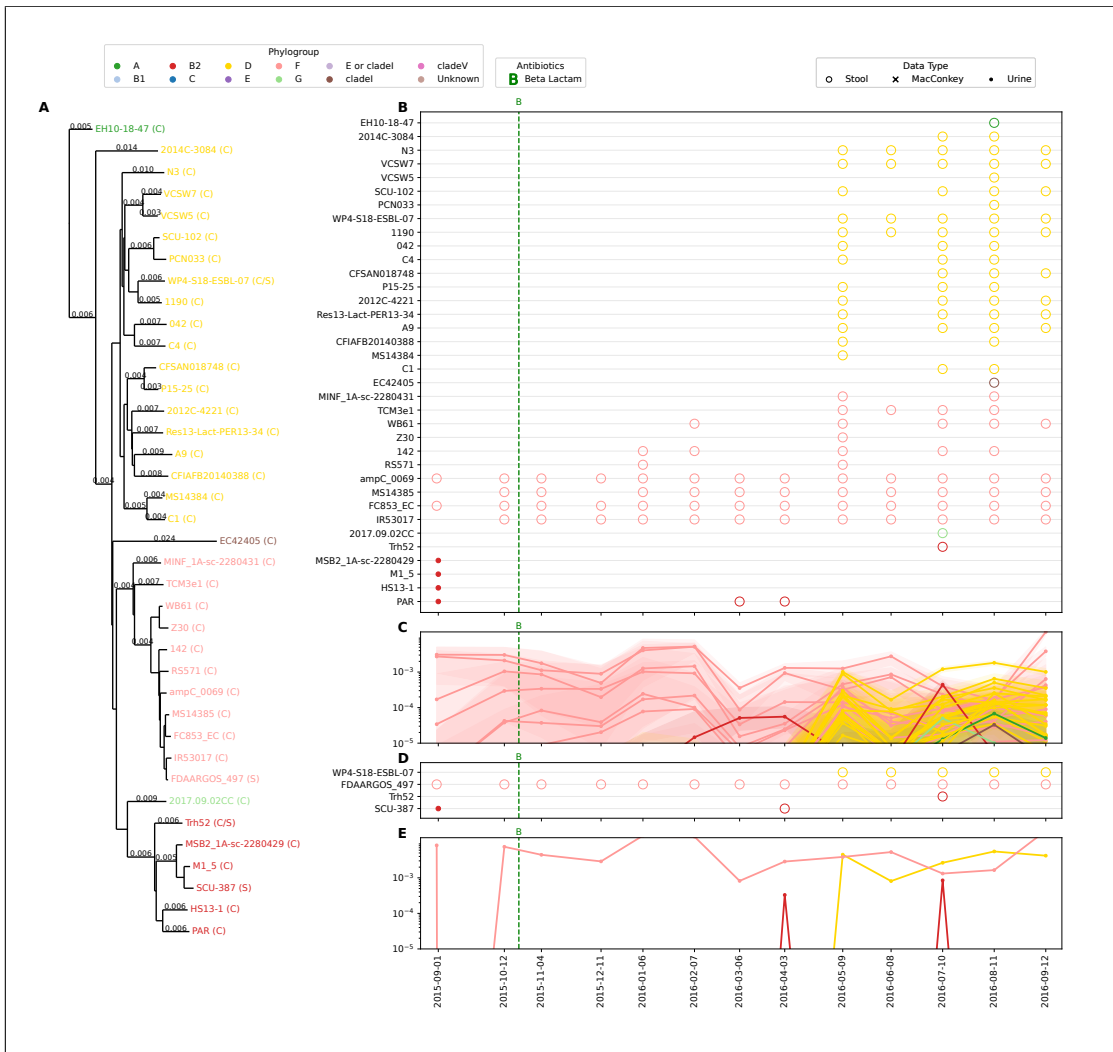

Supplemental Figure 3: Participant UMB03

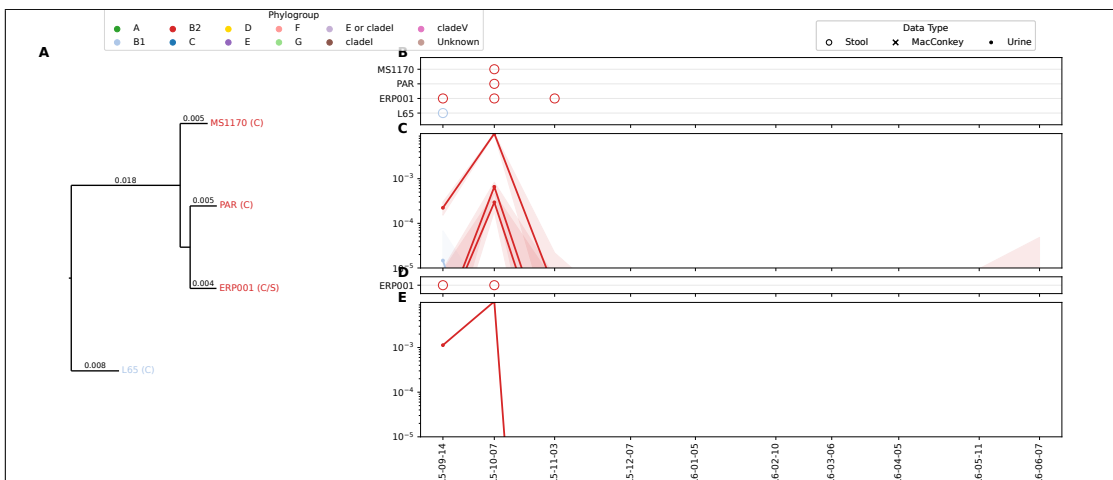

Supplemental Figure 4: Participant UMB04

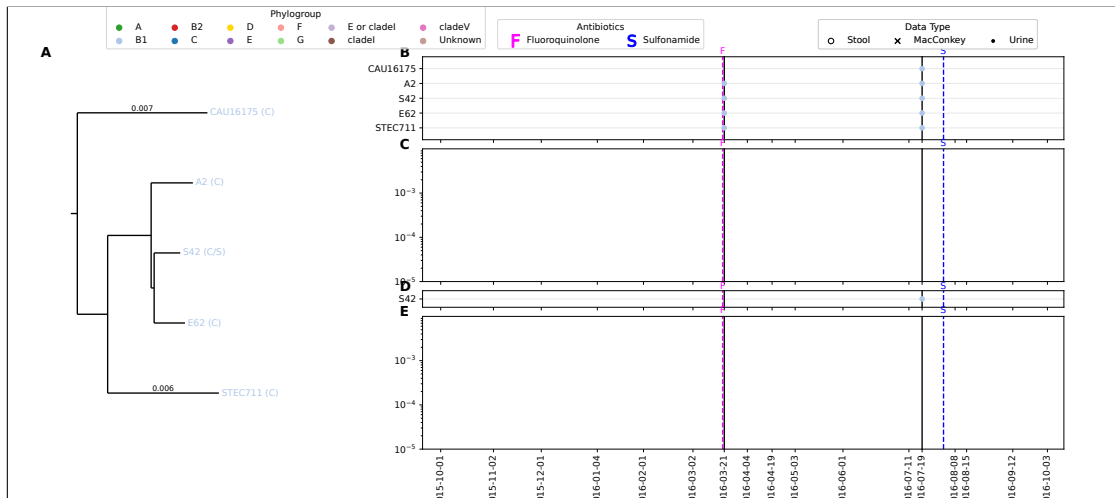

Supplemental Figure 5: Participant UMB05

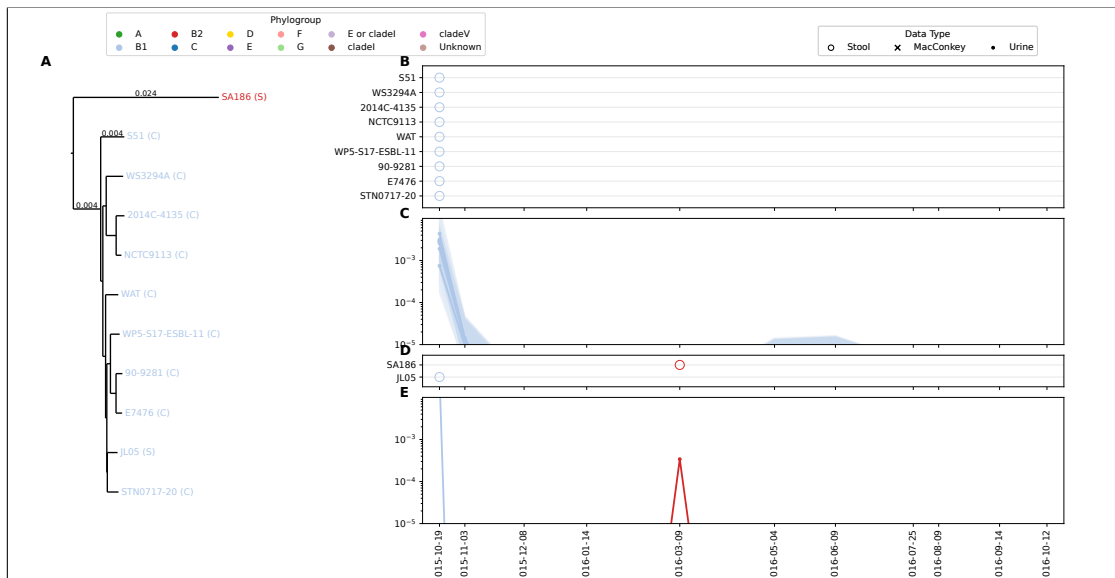

Supplemental Figure 6: Participant UMB06

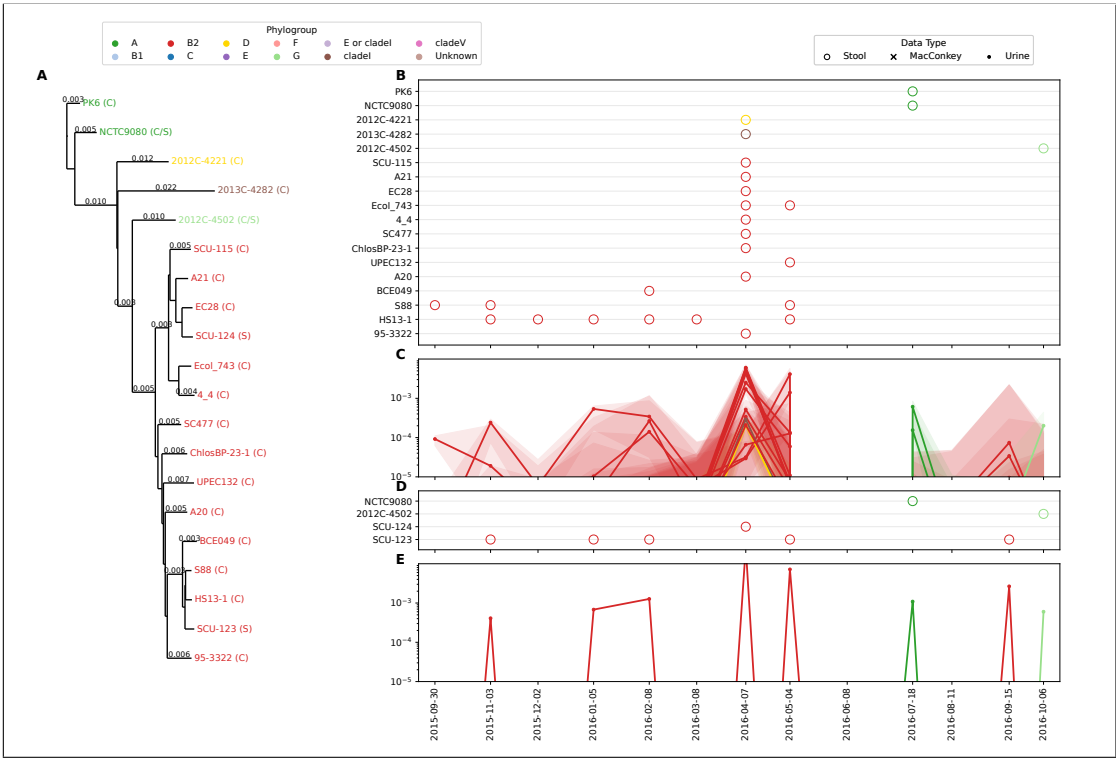

Supplemental Figure 7: Participant UMB07

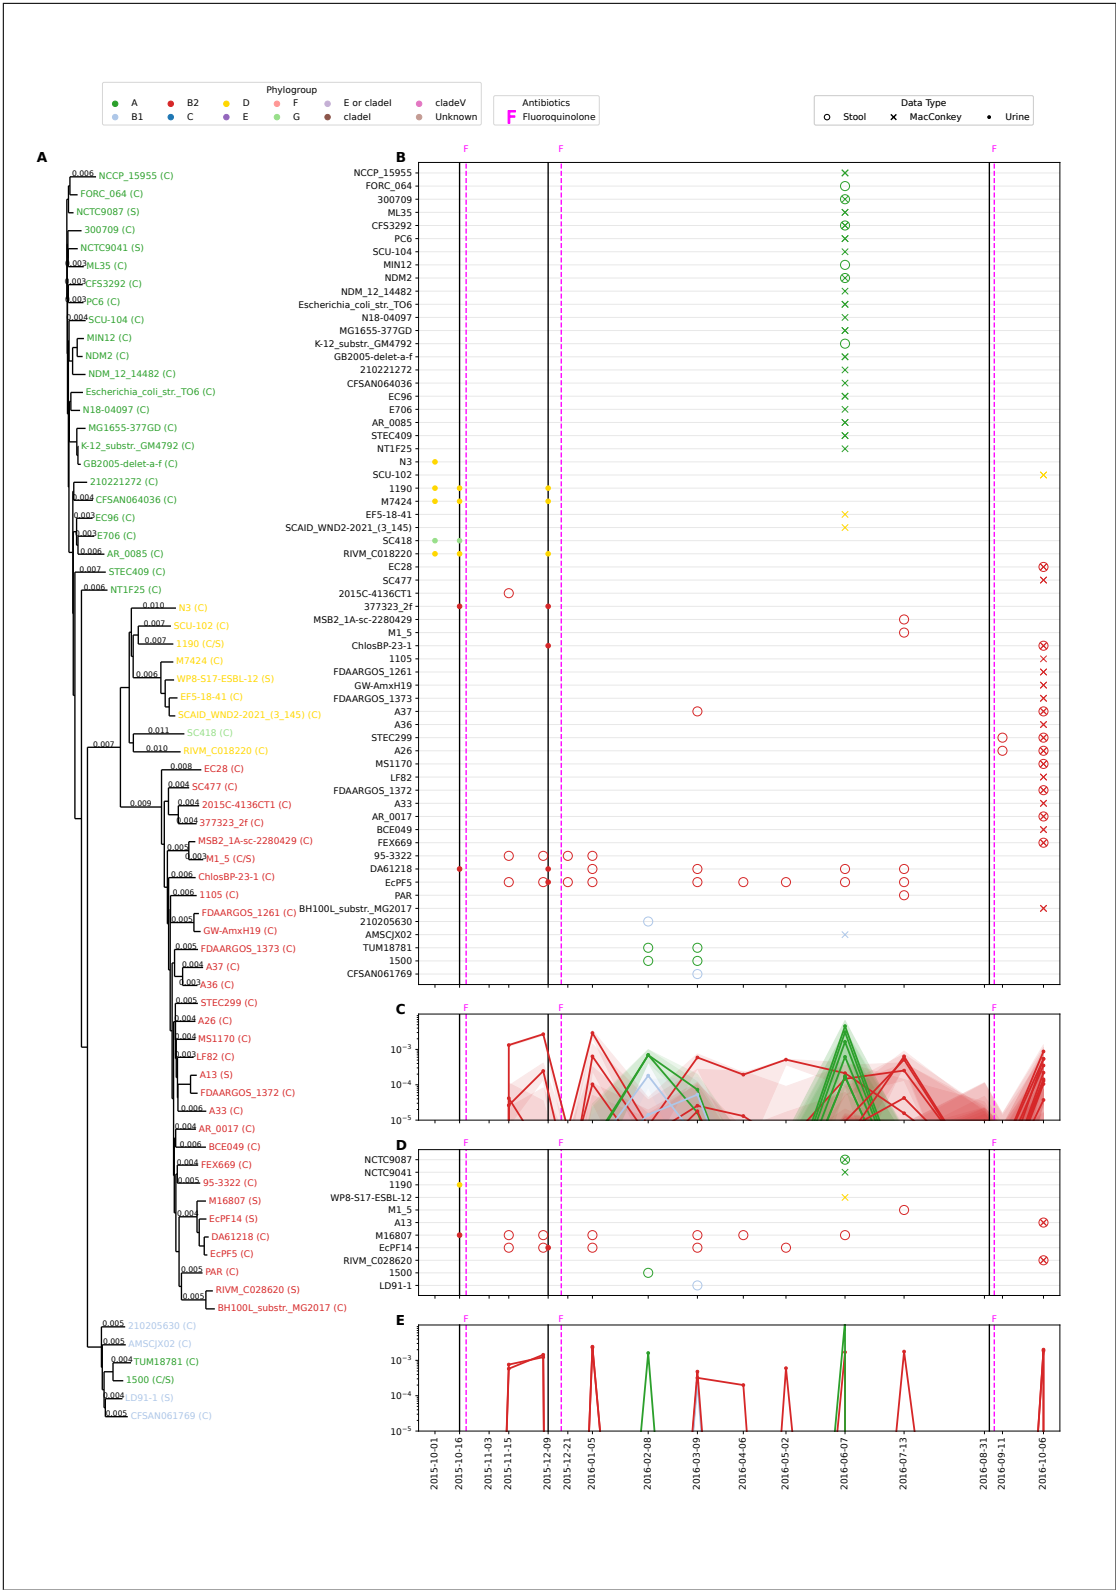

Supplemental Figure 8: Participant UMB08

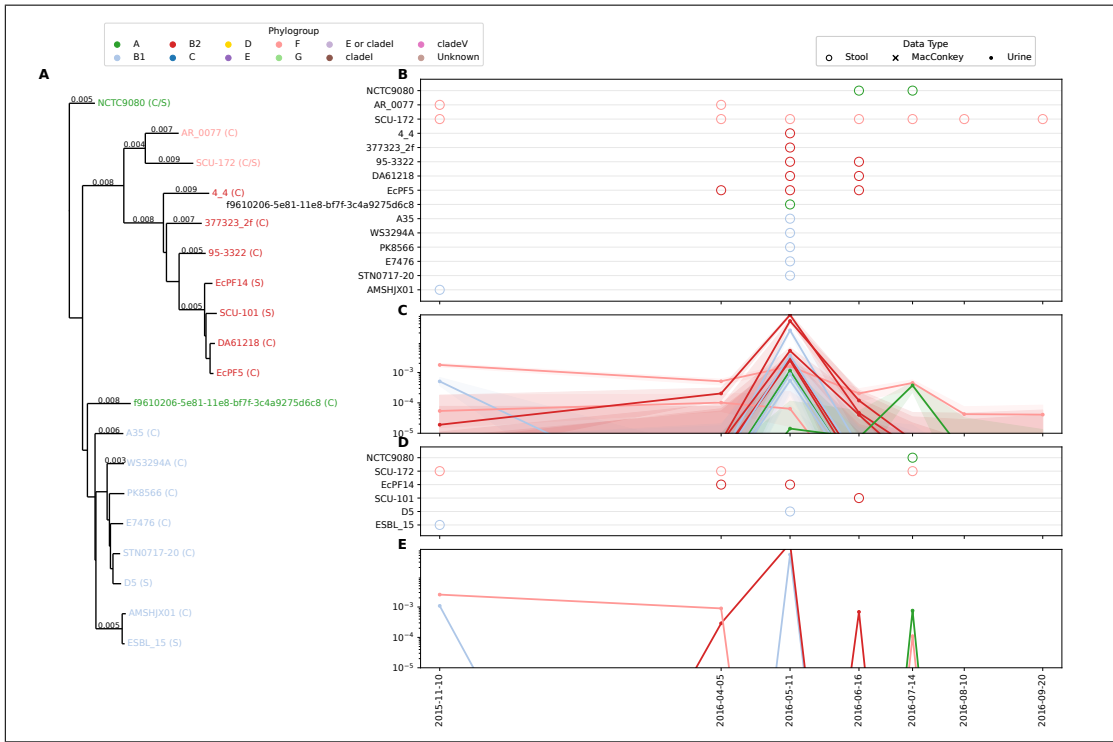

Supplemental Figure 9: Participant UMB09

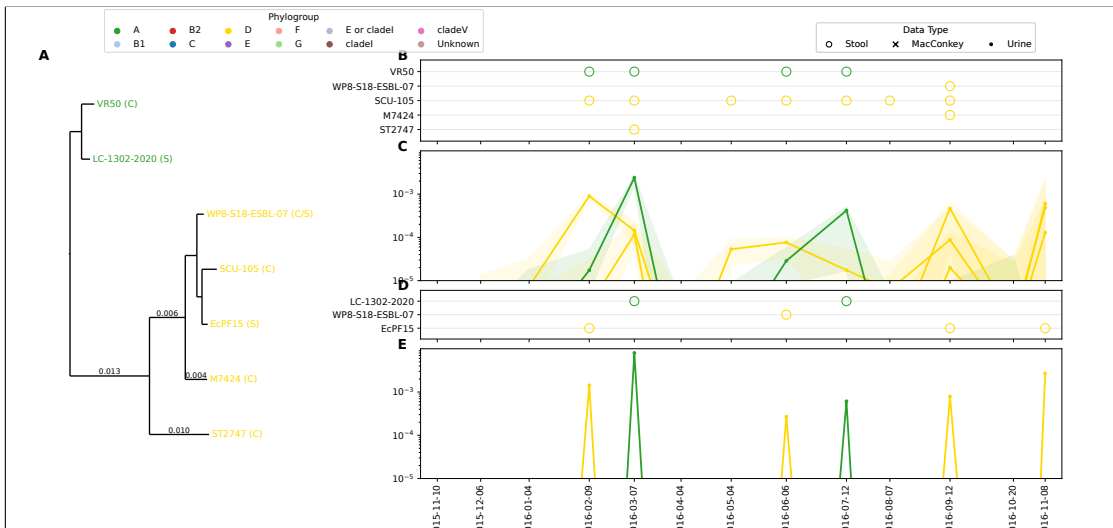

Supplemental Figure 10: Participant UMB10

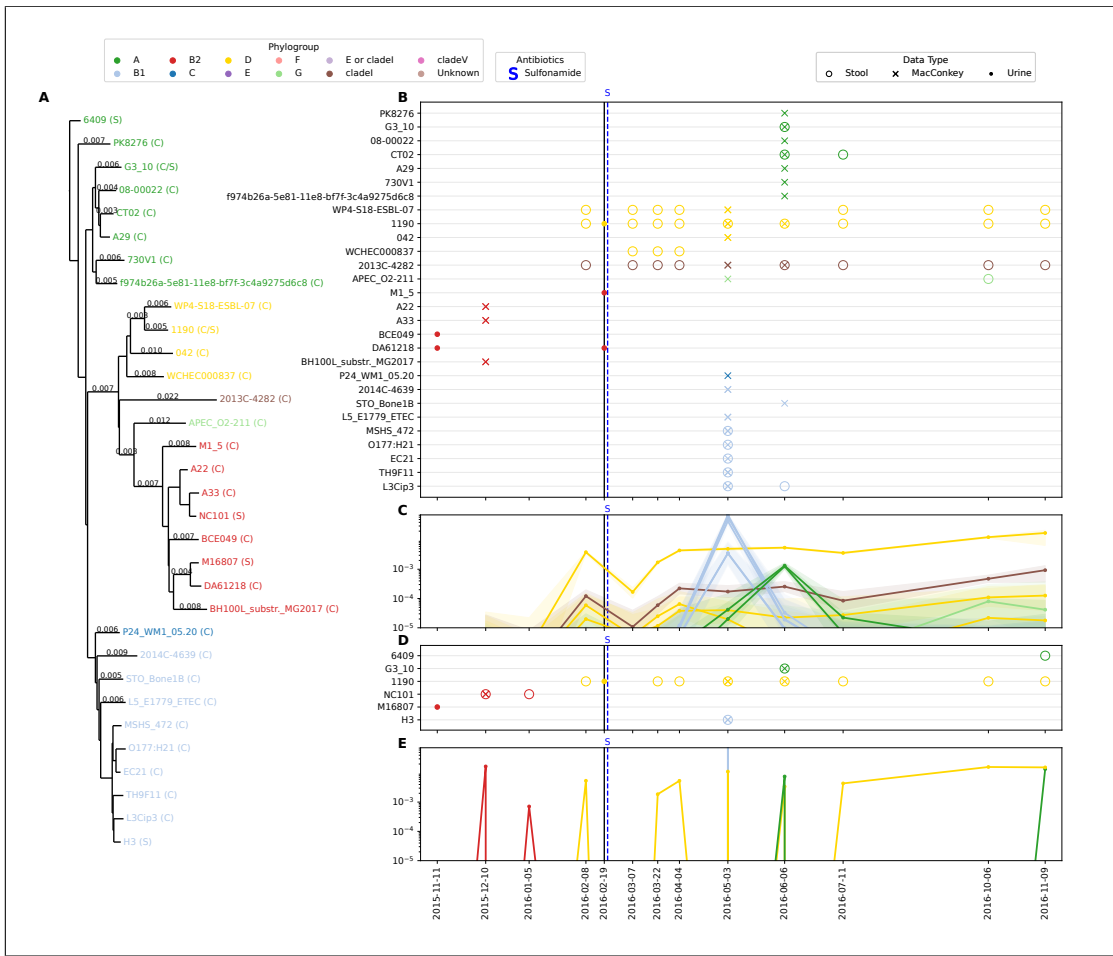

Supplemental Figure 11: Participant UMB11

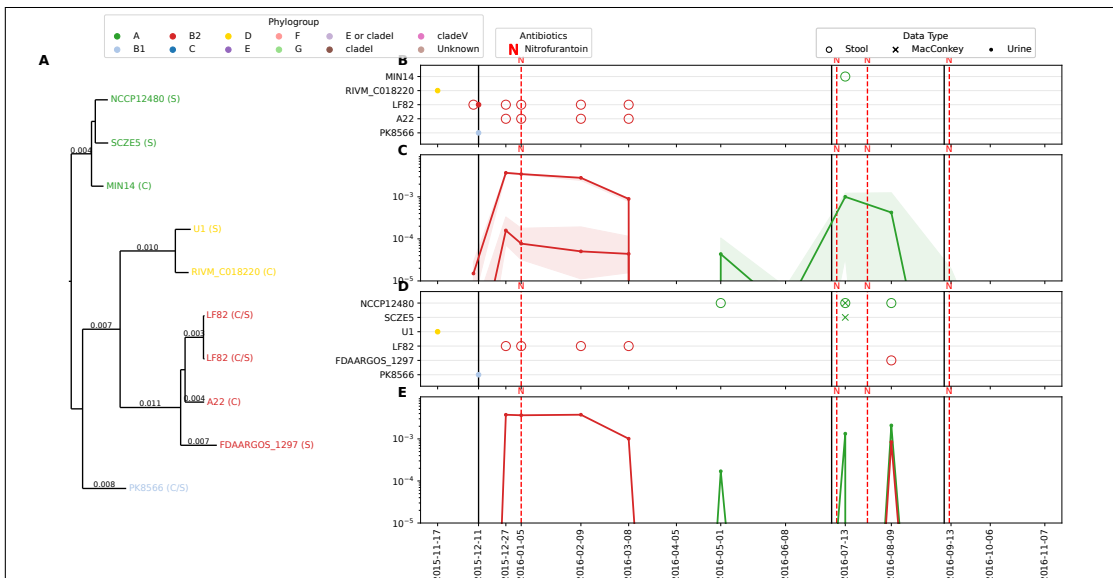

Supplemental Figure 12: Participant UMB12



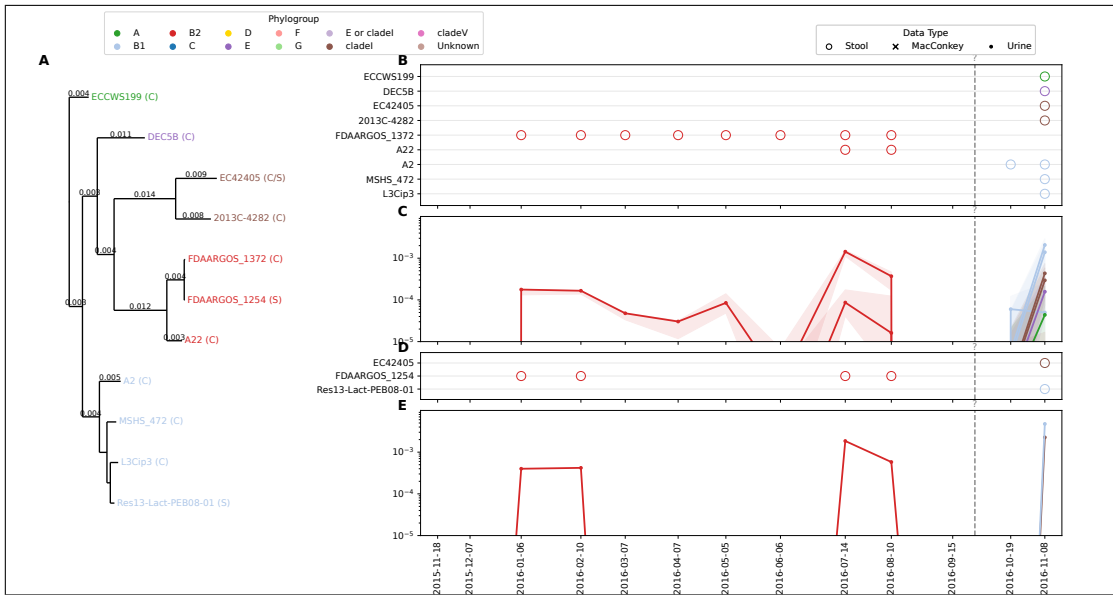

Supplemental Figure 13: Participant UMB13

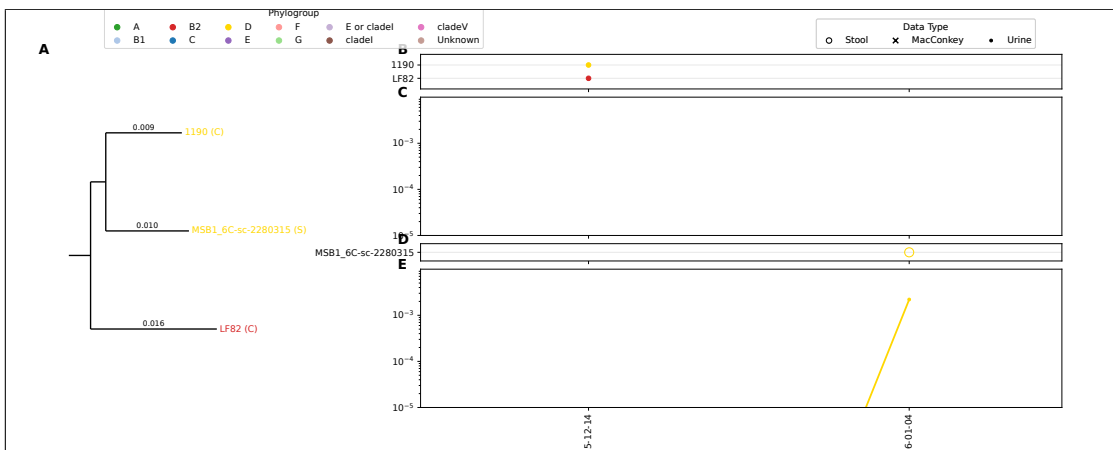

Supplemental Figure 14: Participant UMB14

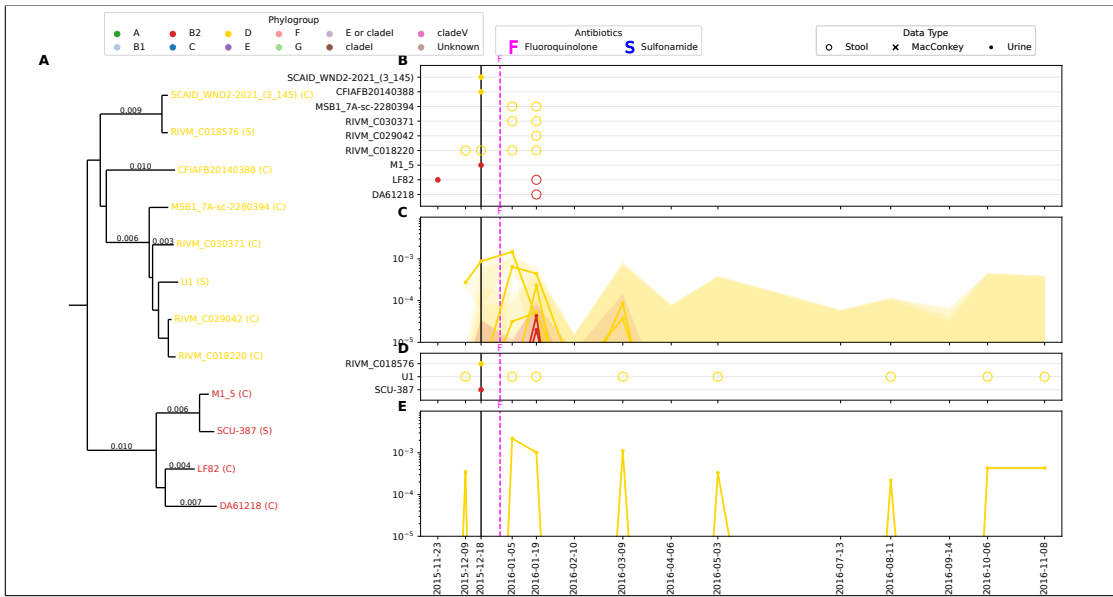

Supplemental Figure 15: Participant UMB15

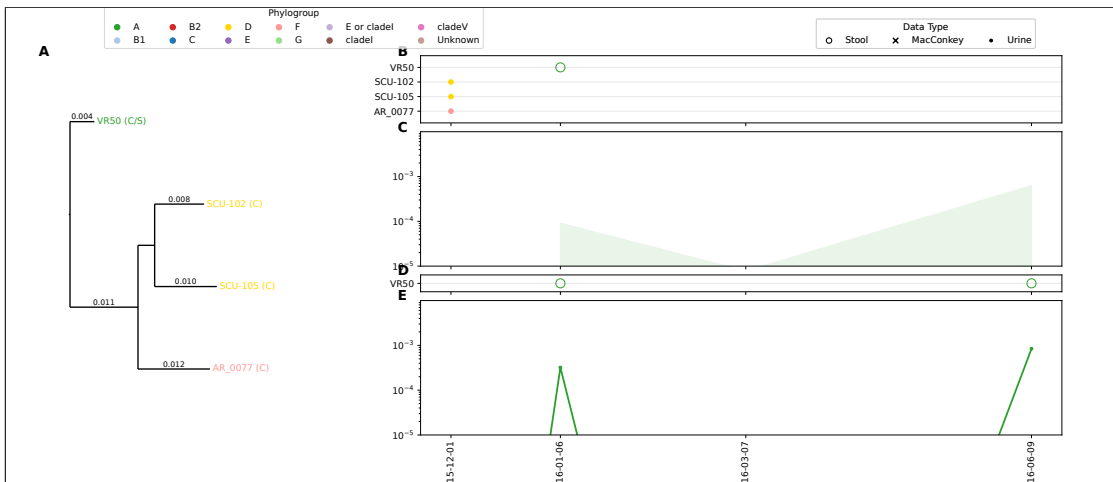

Supplemental Figure 16: Participant UMB16

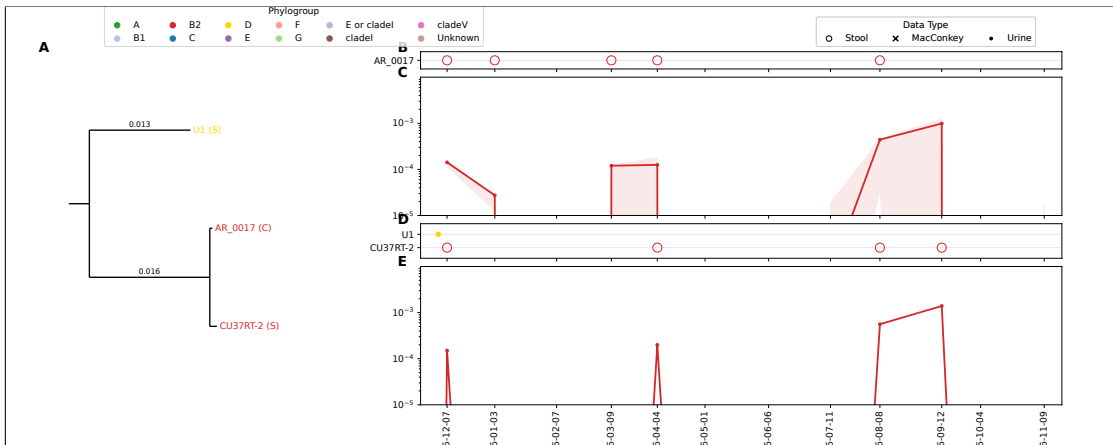

Supplemental Figure 17: Participant UMB17

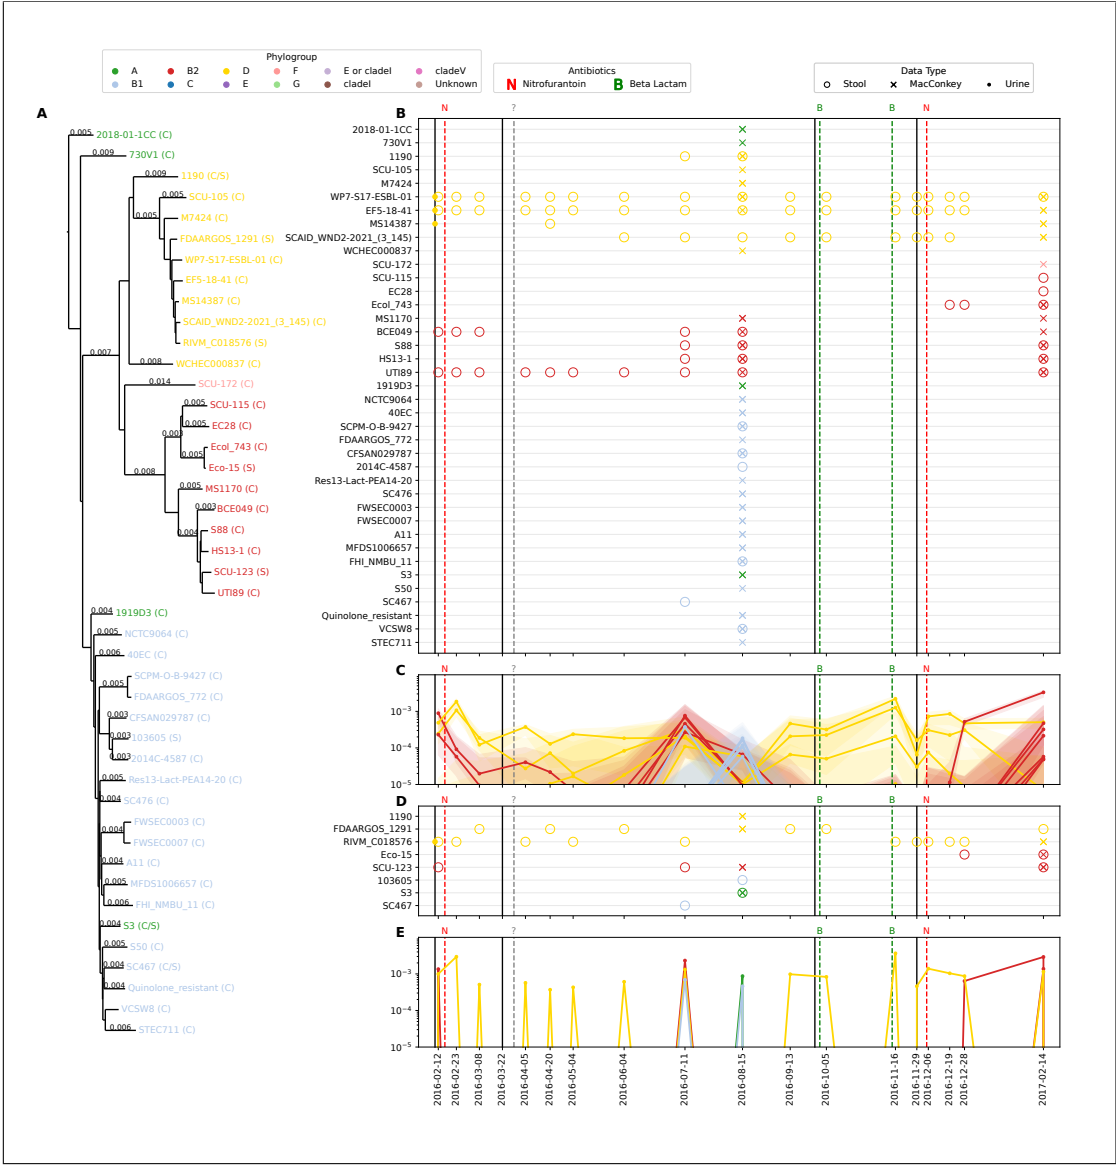

Supplemental Figure 18: Participant UMB18

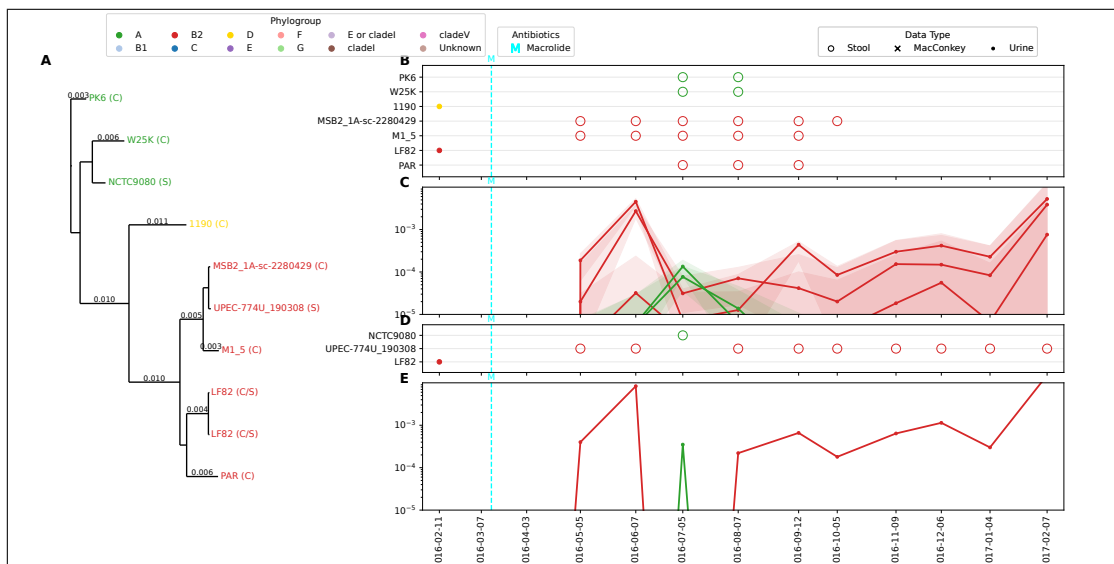

Supplemental Figure 19: Participant UMB19

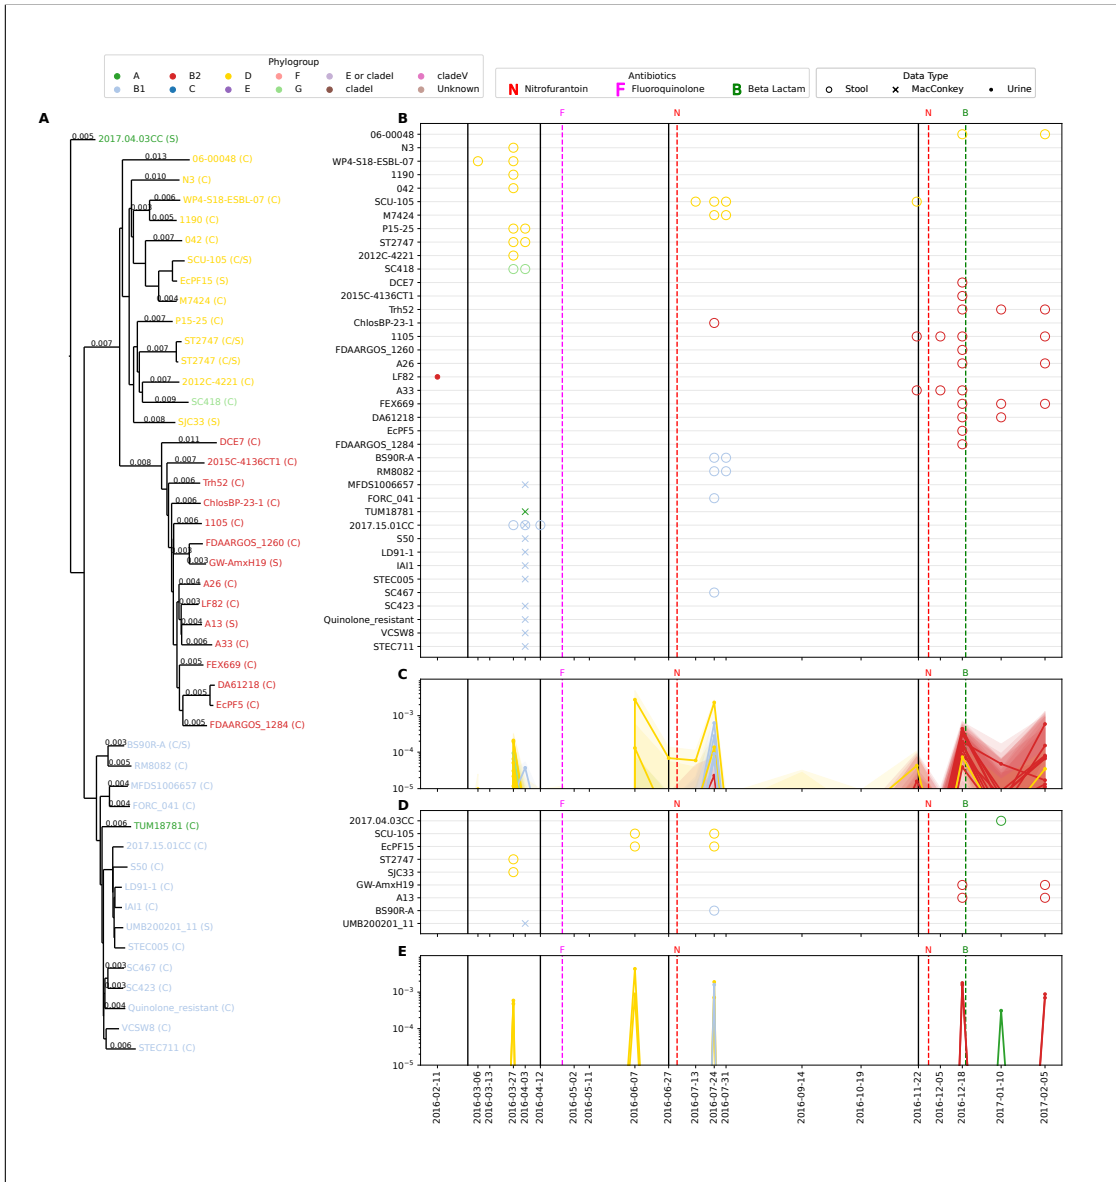

Supplemental Figure 20: Participant UMB20

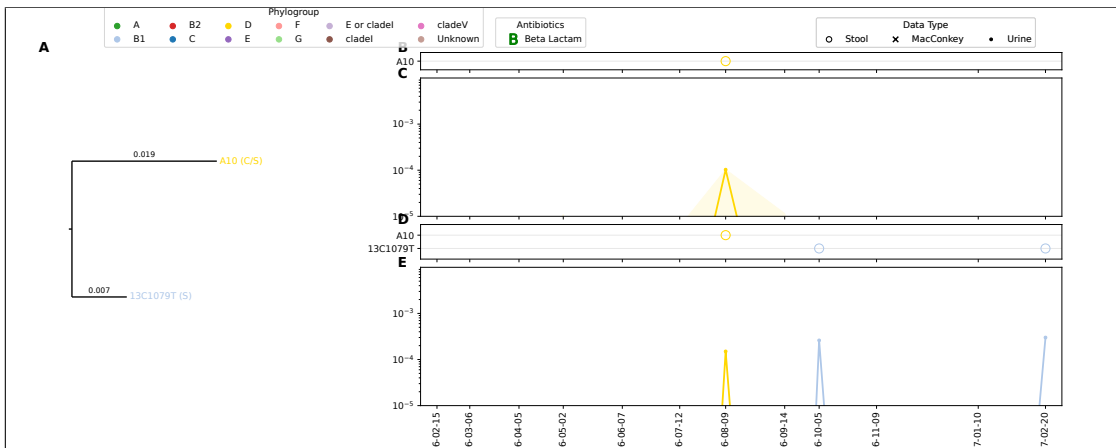

Supplemental Figure 21: Participant UMB21

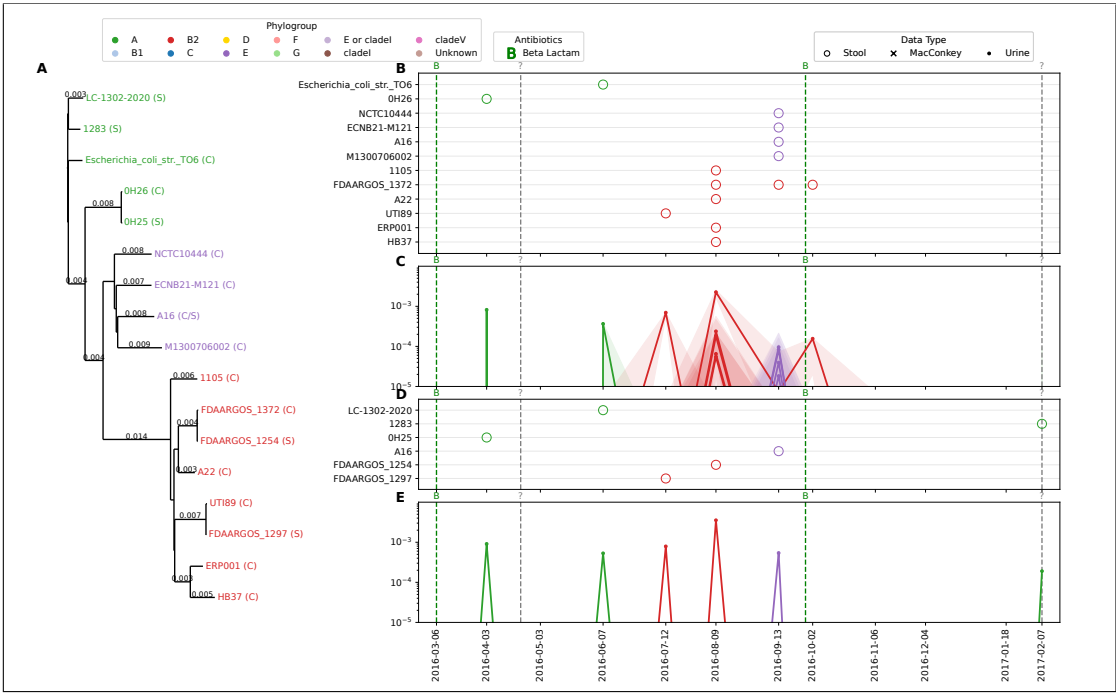

Supplemental Figure 22: Participant UMB2

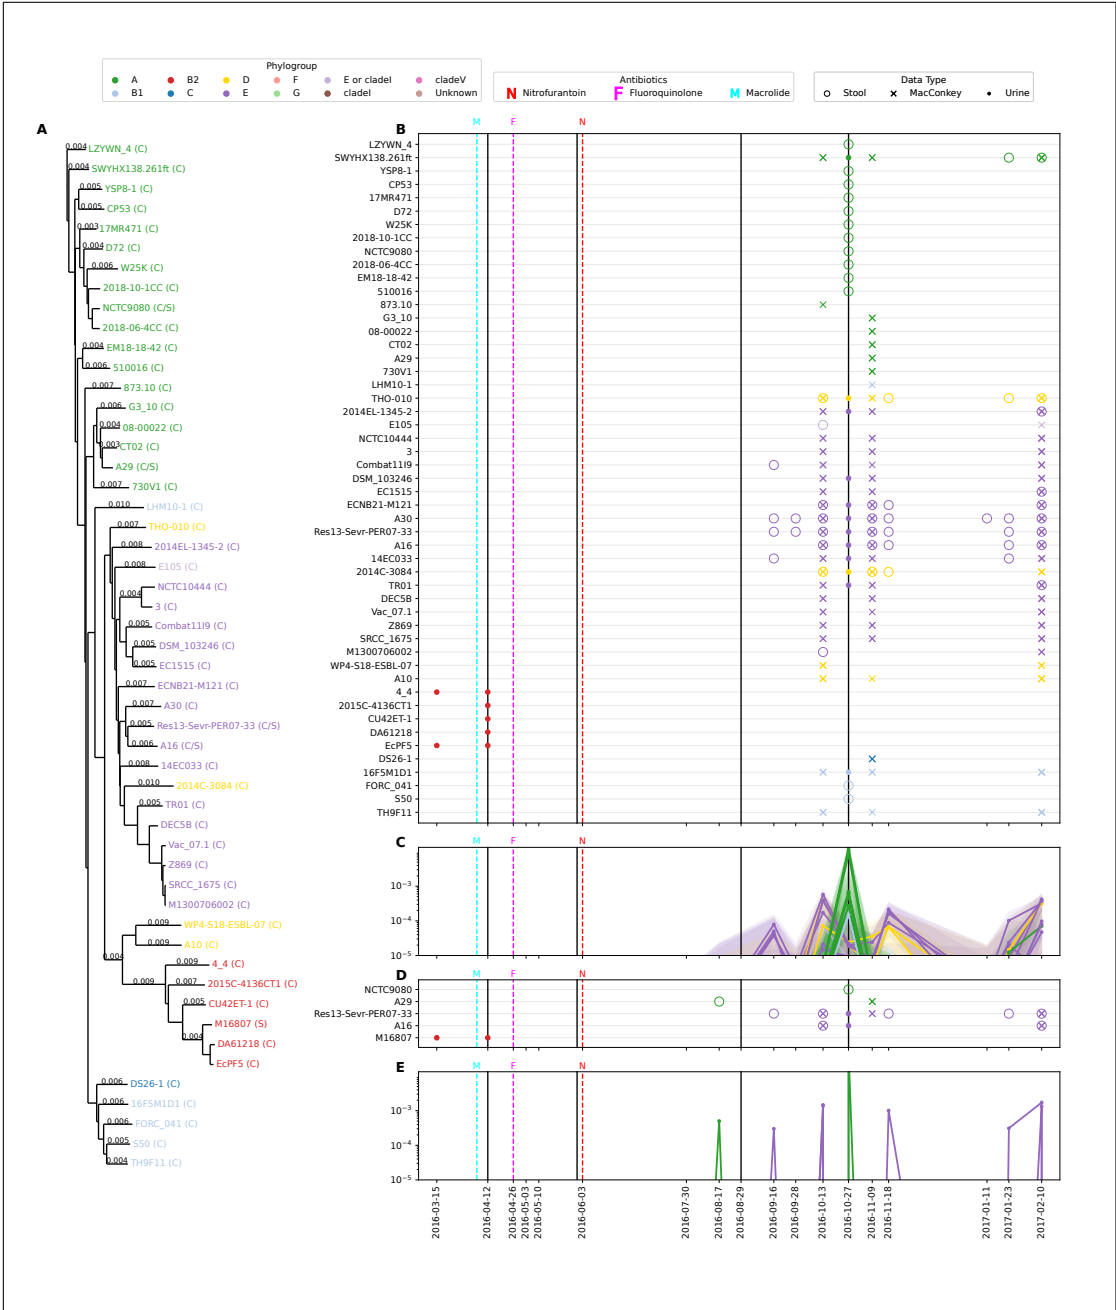

Supplemental Figure 23: Participant UMB23

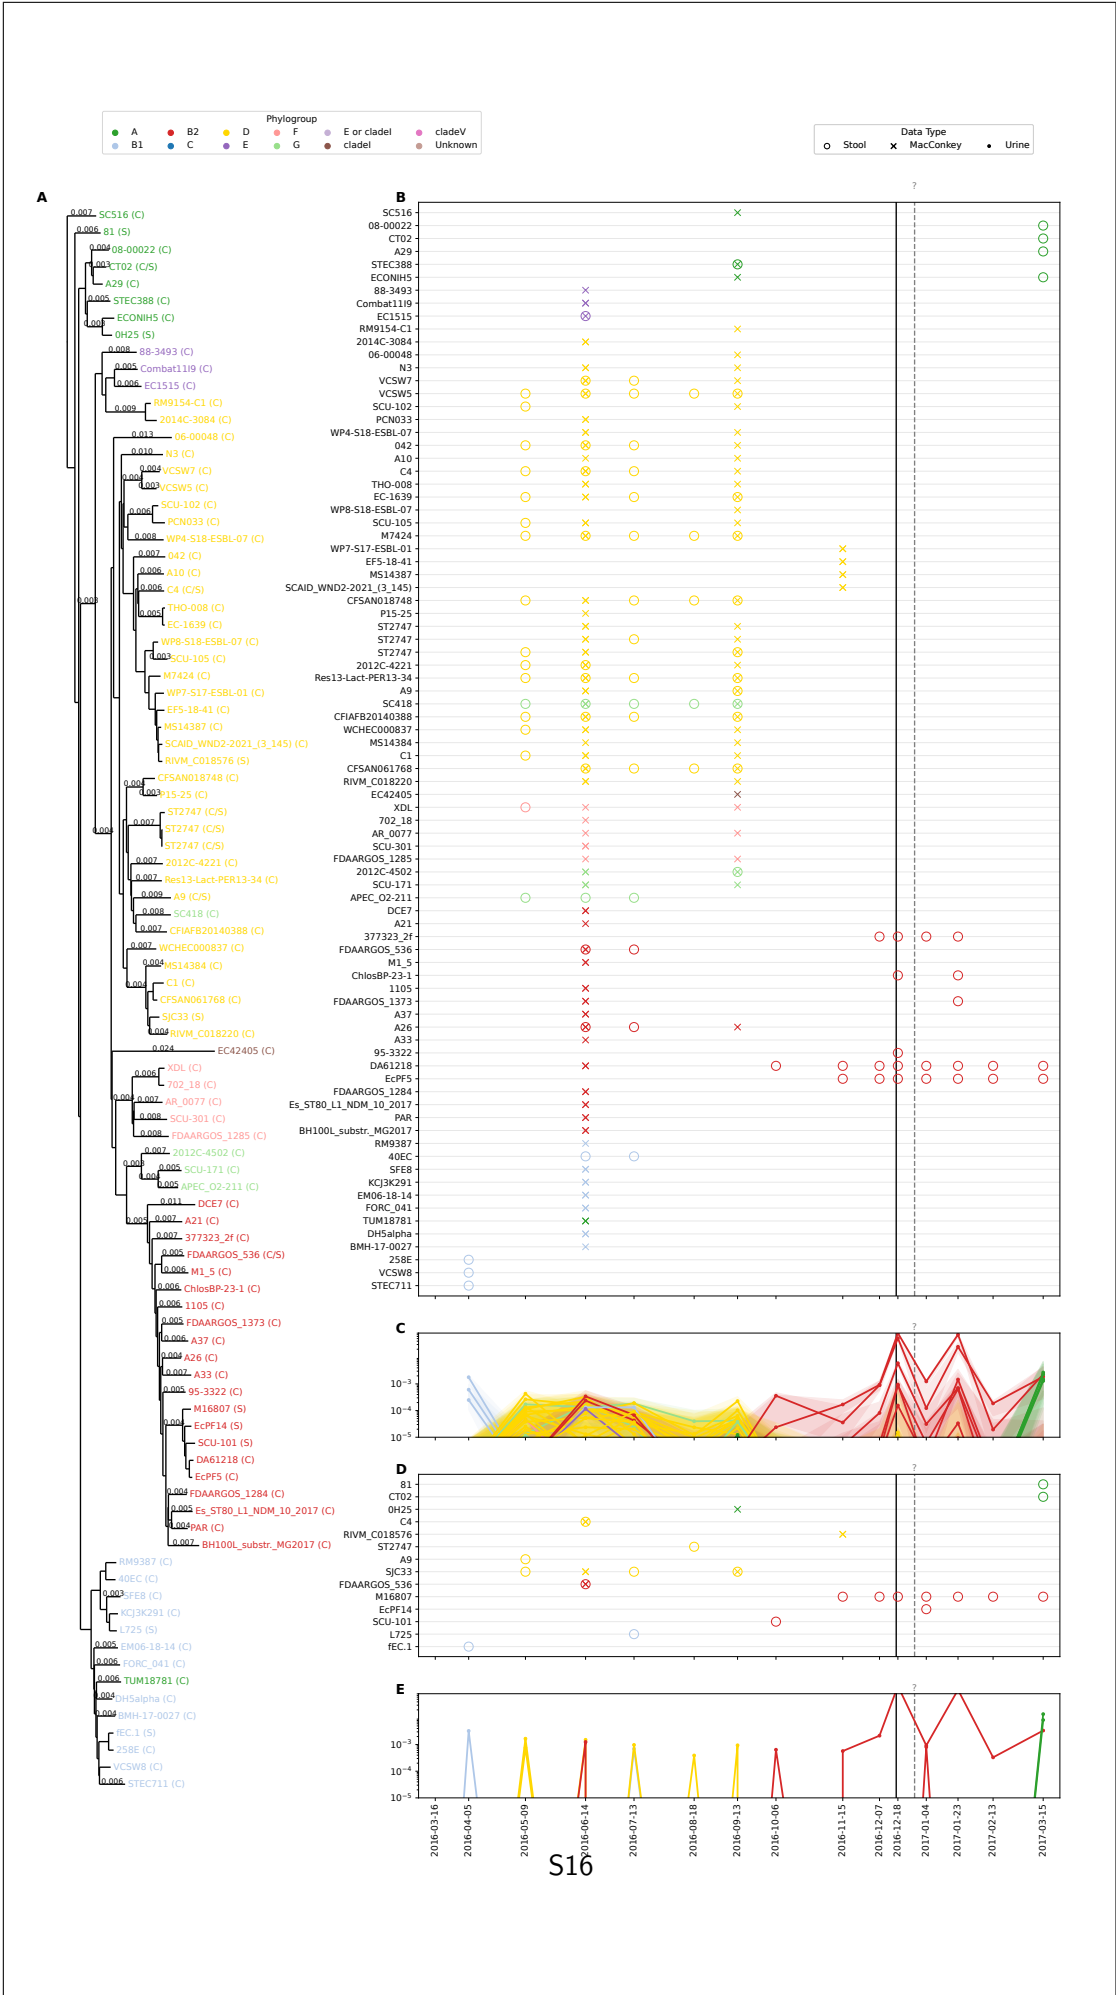



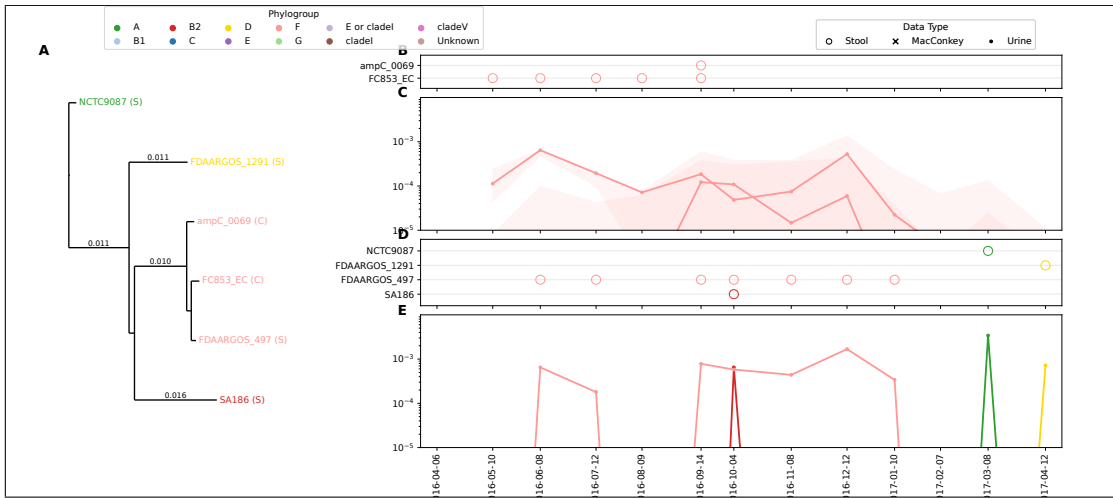

Supplemental Figure 25: Participant UMB25

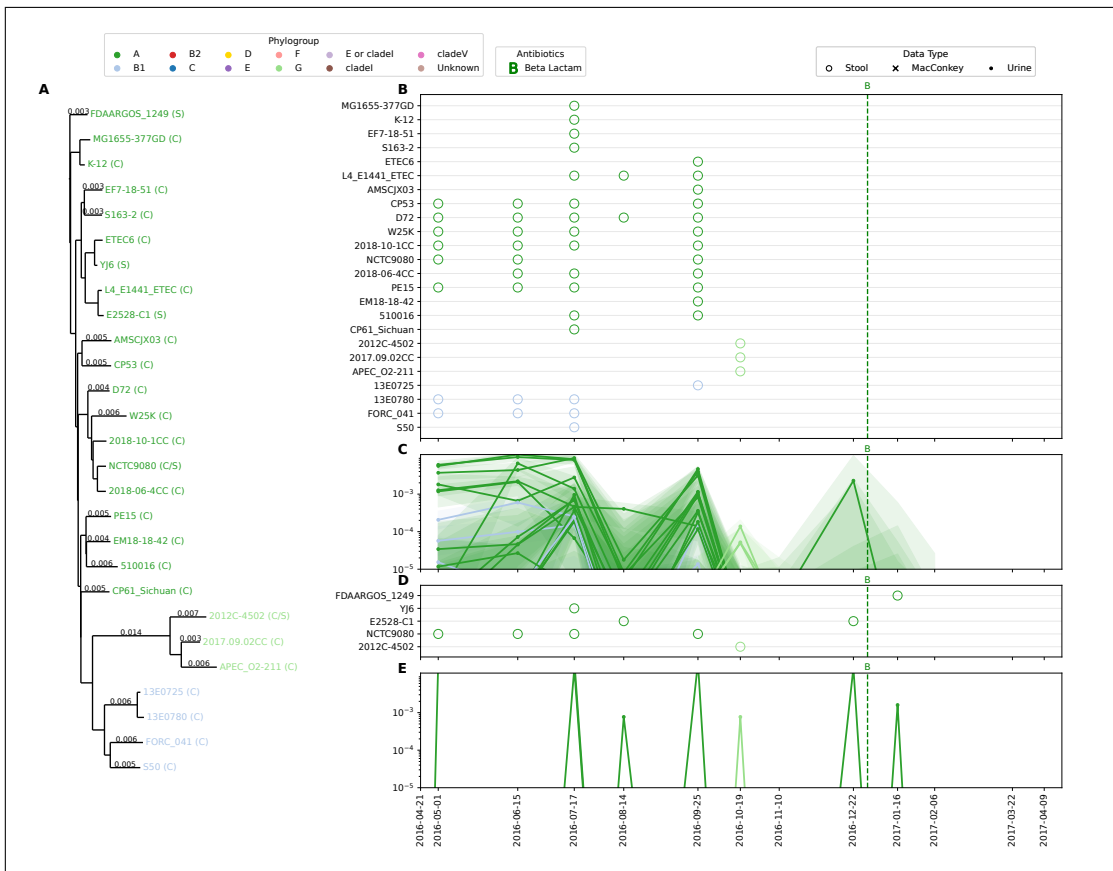

Supplemental Figure 26: Participant UMB26

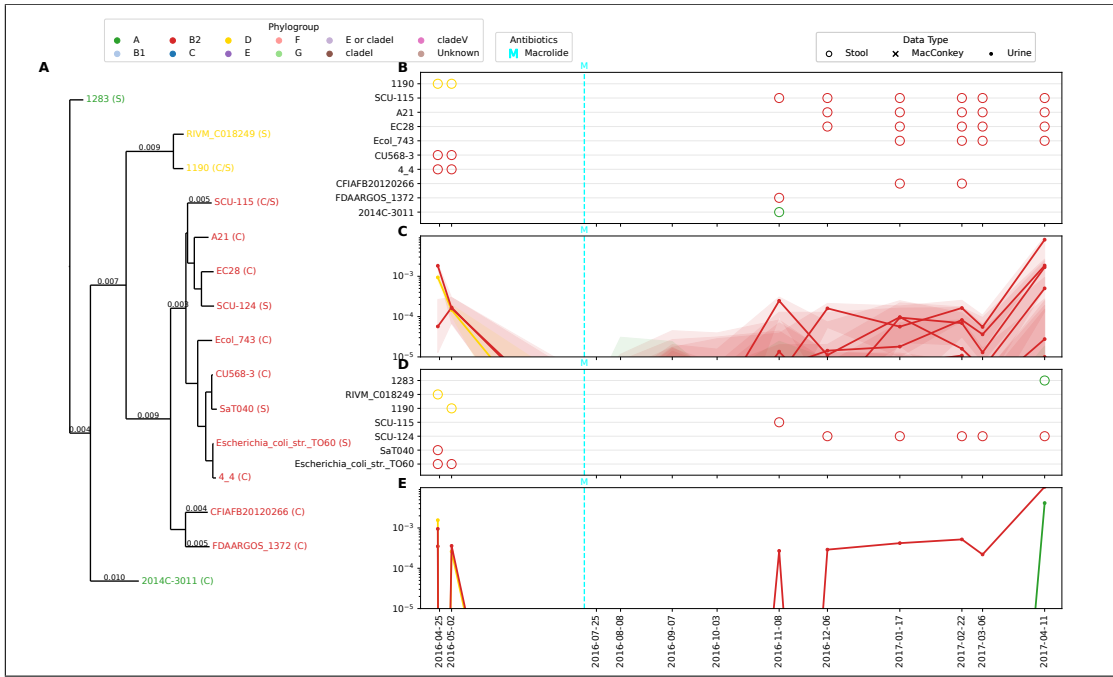

Supplemental Figure 27: Participant UMB27

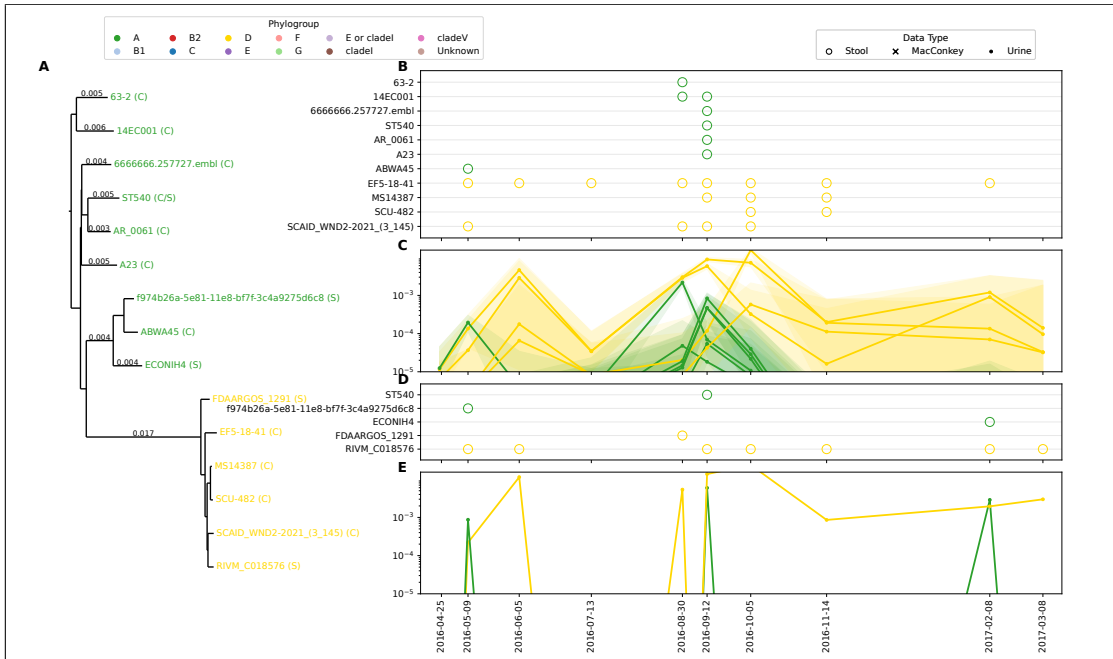

Supplemental Figure 28: Participant UMB28

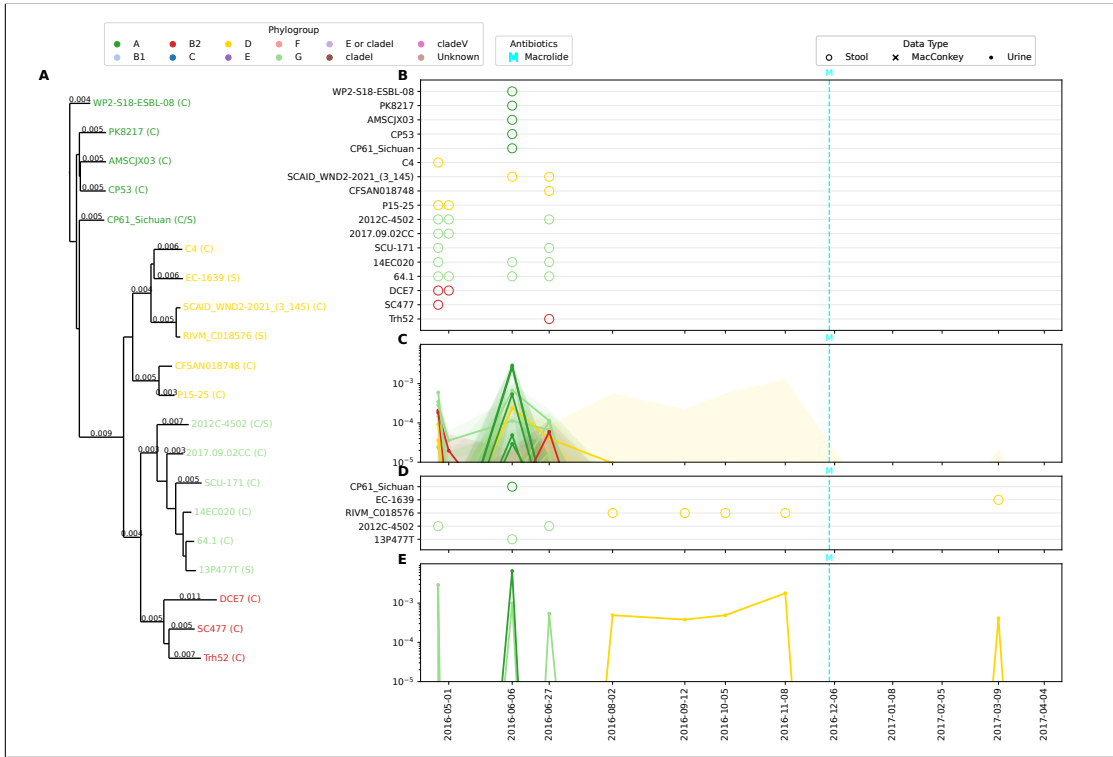

Supplemental Figure 29: Participant UMB29

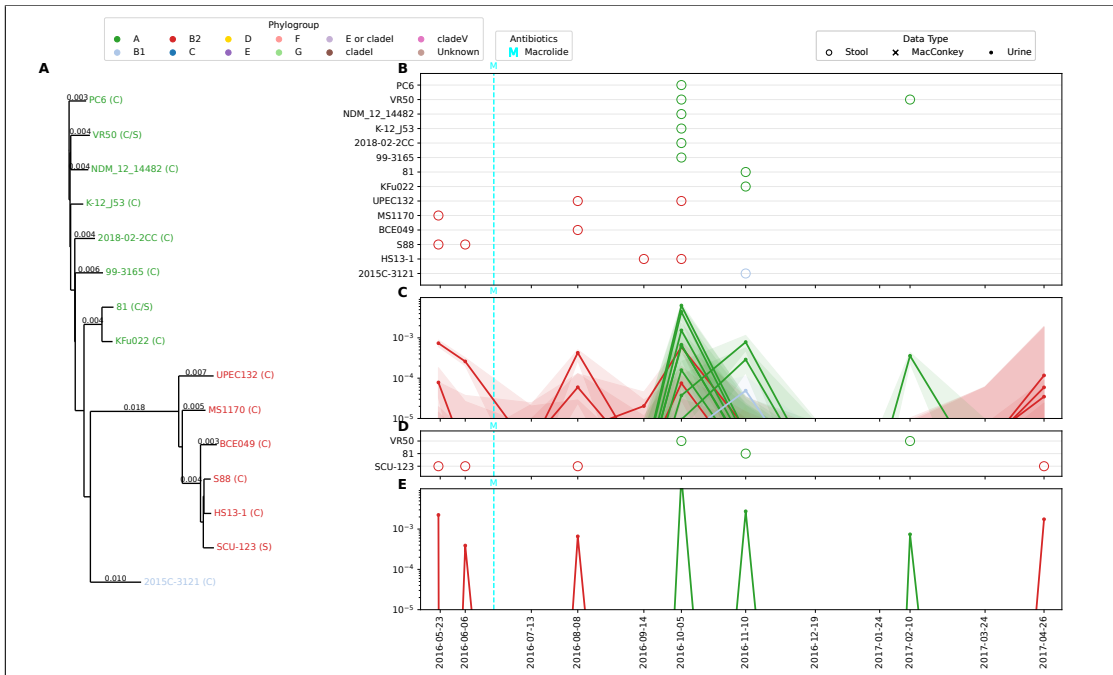

Supplemental Figure 30: Participant UMB31

## Supplemental Tables

### Fully Synthetic Experiment p-values

| Diff. from ChronoStrain | # Simulated Reads |                 |        |                 |        |
|-------------------------|-------------------|-----------------|--------|-----------------|--------|
|                         | $10^4$            | $5 \times 10^4$ | $10^5$ | $5 \times 10^5$ | $10^6$ |
| StrainGST               | 0.006             | 0.000           | 0.000  | 0.000           | 0.000  |
| StrainEst               | 0.000             | 0.000           | 0.000  | 0.002           | 0.011  |

**Supplemental Table 1: *p*-values from semisynthetic benchmark.** Benjamini-Hochberg corrected *p*-values across all coverages and across all methods. Prior to the correction, each raw *p*-value measures the significance derived from a one-sided Wilcoxon test using  $n = 10$  synthetic replicates.

### Semisynthetic Experiment p-values

| Diff. from ChronoStrain |         | Coverage |       |       |       |       |
|-------------------------|---------|----------|-------|-------|-------|-------|
|                         |         | 0.07x    | 0.15x | 0.30x | 0.75x | 1.50x |
| StrainGST               | TV Err. | 0.002    | 0.002 | 0.002 | 0.002 | 1.000 |
|                         | Recall  | 0.002    | 0.002 | 0.002 | 0.002 | 0.084 |
|                         | Correl. | 0.003    | 0.003 | 0.006 | 0.022 | 0.492 |
| StrainEst               | TV Err. | 0.002    | 0.002 | 0.002 | 0.002 | 0.011 |
|                         | Recall  | 0.002    | 0.002 | 0.002 | 0.002 | 0.010 |
|                         | Correl. | 0.003    | 0.003 | 0.003 | 0.003 | 0.013 |

**Supplemental Table 2: *p*-values from semisynthetic benchmark.** Separately for each metric, Benjamini-Hochberg correction was applied across all coverages and across all methods. Prior to the correction, each raw *p*-value measures the significance derived from a two-sided Wilcoxon test using  $n = 10$  synthetic replicates.
